# Supplementary material
Source: publisher figshare collection journal article supplement (https://wiley.figshare.com/articles/dataset/_/3560925)
Supplement: Supplementary file 1 [file 1 › appendix-B.htm]

Ecological Archives E095-290-A2


*Ecological Archives* E095-290-A2

J. Wilson White, Steven G. Morgan, Jennifer L. Fisher. 2014. Planktonic larval mortality rates are lower than widely expected. *Ecology* 95:3344–3353. http://dx.doi.org/10.1890/13-2248.1

Appendix B. Computational details and method validation.

> View / download PDF.


---

[Back to E095-290]
